# Supplementary material for: Complete Pathological Response to Neoadjuvant Pembrolizumab in a Patient With Chemoresistant Upper Urinary Tract Urothelial Carcinoma: A Case Report
Source: Front Oncol. 2020 Sep 24;10:564714. doi: 10.3389/fonc.2020.564714 (PMC7541700; doi:10.3389/fonc.2020.564714)
Supplement: Supplementary file 1 [file Table_1.XLSX]

## Sheet: Vectara data
Slide ID	Cancer	Stroma			Slide ID	Cancer	Cancer	Cancer	Cancer	Cancer	CD8	CD8
Post 1	32894176	122803664			Slide ID	Cancer	CD20	CD4	Ki67+	Ki67-	Ki67+	Ki67-
Post 2	18458144	128926128			Post 1	3681	684	128	1261	3232	1729	7207
Pre	7675840	5679072			Post 2	1157	209	84	459	743	282	7293
					Pre	2693		8	991	1704	141	245
Area(mm2)				Counts	Cancer area	Cancer area	Cancer area	Cancer area	Cancer area	Cancer area
Slide ID	Cancer	Stroma		Slide ID	Cancer cells	CD20	CD4	CD8	CD8+Ki67+	CD8+Ki67-
Pre	7675840	5679072		Pre	2693	0	8	273	141	245
Post	51352320	251729792		Post	4838	893	212	2953	2011	14500

## Sheet: analysis
	Density ca areaCD20	Density ca areaCD4	Density ca areaCD8	Density ca areaCD8+Ki67+			Ca Area
Pre	2.69564	30.8501	115.613	42.2317			13354912
Post	52.4478	11.8516	217.908	26.5407			303082112
